# Supplementary material
Source: MDPI journal article supplement (https://www.mdpi.com/2073-4344/12/9/988)
Supplement: s1 [file s1]

Archive with 2 entries (2 files):
- catalysts-1794454-supplementary.pdf
- Rippers_et_al_coordinates.xyz
