# Supplementary material
Source: MDPI journal article supplement (https://www.mdpi.com/2073-4344/12/9/988)
Supplement: s1 [file s1 › catalysts-1794454-supplementary.pdf]

## Supplementary Information

### Understanding 2D-IR Spectra of Hydrogenases: A Descriptive and Predictive Computational Study

Yvonne Rippers <sup>1</sup>, Barbara Procacci <sup>2</sup>, Neil T. Hunt <sup>2</sup> and Marius Horch <sup>1,\*</sup>

<sup>1</sup>Department of Physics, Freie Universität Berlin, Arnimallee 14, 14195 Berlin, Germany

<sup>2</sup>Department of Chemistry and York Biomedical Research Institute, University of York, York YO10 5DD, UK

\* marius.horch@fu-berlin.de

#### Table of Contents

|                                                                                                                                                                           |   |
|---------------------------------------------------------------------------------------------------------------------------------------------------------------------------|---|
| <b>Table S1:</b> Summary of relevant quantities discussed in the manuscript .....                                                                                         | 2 |
| <b>Figure S1:</b> Infrared spectra and three-level energy scheme for two coupled vibrational modes .....                                                                  | 3 |
| <b>Figure S2:</b> Normal mode eigenvectors of $\nu\text{CO}$ , $\nu\text{CN}_{\text{as}}$ , and $\nu\text{CN}_{\text{s}}$ ligand stretch vibrations (modes #64–#66) ..... | 3 |
| <b>Figure S3:</b> Normal mode eigenvectors of $\nu\text{Fe-CO/CN}$ and $\delta\text{Fe-CO/CN}$ metal-ligand vibrations (modes #31–#39) .....                              | 4 |
| <b>Figure S4:</b> Normal mode eigenvectors of $\delta/\nu\text{Ni-S}$ vibrations (modes #22–#30) and $\nu\text{SC}$ vibrations (modes #40–#43) .....                      | 5 |
| <b>Figure S5:</b> Matrix representation of intramode anharmonicities $\Delta\omega_{1-2}^a$ and intermode anharmonicities $\Delta\omega_{a/b}$ .....                      | 6 |
| <b>Table S2:</b> Internal-coordinate description of vibrational modes for all computational models .....                                                                  | 6 |

**Table S1:** Summary of relevant quantities discussed in the manuscript (all in  $\text{cm}^{-1}$ ).<sup>‡</sup>

| model              | mode              | $\omega_{\text{H}}^a$ | $\omega_{0 \rightarrow 1}^a$ | $\omega_{1 \rightarrow 2}^a$ | $\Delta\omega_{\text{H}-1}^a$ | $\Delta\omega_{1-2}^a$ | $\Delta\omega_{a/b}$ | $\Delta\omega_{1-2}^{a'}$ | $\Delta\omega_{a/b}^{a'}$ | $\Delta\omega_{1-2}^{a''}$ | $\Delta\omega_{1-2}^{a'''}$ | $\Delta\omega_{1-2}^{a''''}$ | $\Delta\omega_{a/b}^{a''''}$ |      |
|--------------------|-------------------|-----------------------|------------------------------|------------------------------|-------------------------------|------------------------|----------------------|---------------------------|---------------------------|----------------------------|-----------------------------|------------------------------|------------------------------|------|
| Ni <sub>a</sub> -S | vCO               | 1911                  | 1891                         | 1868                         | 20                            | 23                     | -                    | 15                        | -                         | 15                         | 23                          | 21                           | 23                           | -    |
|                    | vCN <sub>as</sub> | 2068                  | 2041                         | 2022                         | 27                            | 19                     | ] 21                 | 17                        | ] 20                      | -6                         | 18                          | 17                           | 14                           | ] 21 |
|                    | vCN <sub>s</sub>  | 2078                  | 2050                         | 2041                         | 28                            | 9                      |                      | 9                         |                           | 12                         | 9                           | 9                            | 14                           |      |
| Ni <sub>a</sub> -C | vCO               | 1919                  | 1896                         | 1873                         | 23                            | 23                     | -                    | 16                        | -                         | 16                         | 22                          | 19                           | 23                           | ] 13 |
|                    | vCN <sub>as</sub> | 2074                  | 2048                         | 2028                         | 25                            | 20                     | ] 13                 | 18                        | ] 12                      | 6                          | 19                          | 18                           | 18                           |      |
|                    | vCN <sub>s</sub>  | 2086                  | 2057                         | 2041                         | 29                            | 16                     |                      | 15                        |                           | 14                         | 16                          | 15                           | 18                           |      |
| <b>1</b>           | vCO               | 1951                  | 1925                         | 1902                         | 26                            | 23                     | -                    | 16                        | -                         | 16                         | 18                          | 18                           | 23                           | ] 24 |
|                    | vCN <sub>as</sub> | 2108                  | 2082                         | 2063                         | 27                            | 19                     | ] 24                 | 16                        | ] 22                      | -12                        | 18                          | 16                           | 12                           |      |
|                    | vCN <sub>s</sub>  | 2116                  | 2089                         | 2084                         | 27                            | 5                      |                      | 5                         |                           | 10                         | 5                           | 6                            | 12                           |      |
| <b>2</b>           | vCO <sub>as</sub> | 2008                  | 1981                         | 1968                         | 28                            | 13                     | ] 24                 | 10                        | ] 18                      |                            |                             |                              | 11                           | ] 24 |
|                    | vCO <sub>s</sub>  | 2046                  | 2017                         | 2007                         | 29                            | 10                     |                      | 8                         |                           |                            |                             |                              | 11                           |      |
|                    | vCN               | 2150                  | 2121                         | 2098                         | 29                            | 24                     | -                    | 21                        | -                         |                            |                             |                              | 24                           |      |

<sup>‡</sup> $\omega_{\text{H}}^a$  – harmonic frequency of mode  $a$ ;  $\omega_{0 \rightarrow 1}^a$  – fundamental frequency of mode  $a$ ;  $\Delta\omega_{\text{H}-1}^a$  – difference between  $\omega_{\text{H}}^a$  and  $\omega_{0 \rightarrow 1}^a$ ;  $\Delta\omega_{1-2}^a$  – intramode anharmonicity, all vibrational degrees included in the anharmonic analysis;  $\Delta\omega_{1-2}^{a'}$  – intramode anharmonicity, only *interacting* vCO and vCN vibrations included in the anharmonic analysis;  $\Delta\omega_{1-2}^{a''}$  – intramode anharmonicity, only *non-interacting* vCO and vCN vibrations included in the anharmonic analysis;  $\Delta\omega_{1-2}^{a'''}$  – intramode anharmonicity, only *interacting* vCO, vCN, vFe–CO/CN, and  $\delta$ Fe–CO/CN vibrations included in the anharmonic analysis;  $\Delta\omega_{1-2}^{a''''}$  – intramode anharmonicity, only *interacting* vCO, vCN, and vFe–CO vibrations included in the anharmonic analysis;  $\Delta\omega_{1-2}^{a''''}$  – intramode anharmonicity, all vibrational degrees included in the anharmonic analysis, *no* consideration of 2-2 Darling-Dennison resonances;  $\Delta\omega_{a/b}$  – intermode anharmonicity (coupling between modes  $a$  and  $b$ ), all vibrational degrees included in the anharmonic analysis.  $\Delta\omega_{a/b}^{a'}$  – intermode anharmonicity, only *interacting* vCO and vCN vibrations included in the anharmonic analysis;  $\Delta\omega_{a/b}^{a''''}$  – intermode anharmonicity, all vibrational degrees included in the anharmonic analysis, *no* consideration of 2-2 Darling-Dennison resonances.  $\Delta\omega_{a/b}$ ,  $\Delta\omega_{a/b}^{a'}$ , and  $\Delta\omega_{a/b}^{a''''}$  refer to pairs of symmetric and antisymmetric bond stretching modes, as indicated.  $\delta$  – bending vibration; v – stretching vibration.

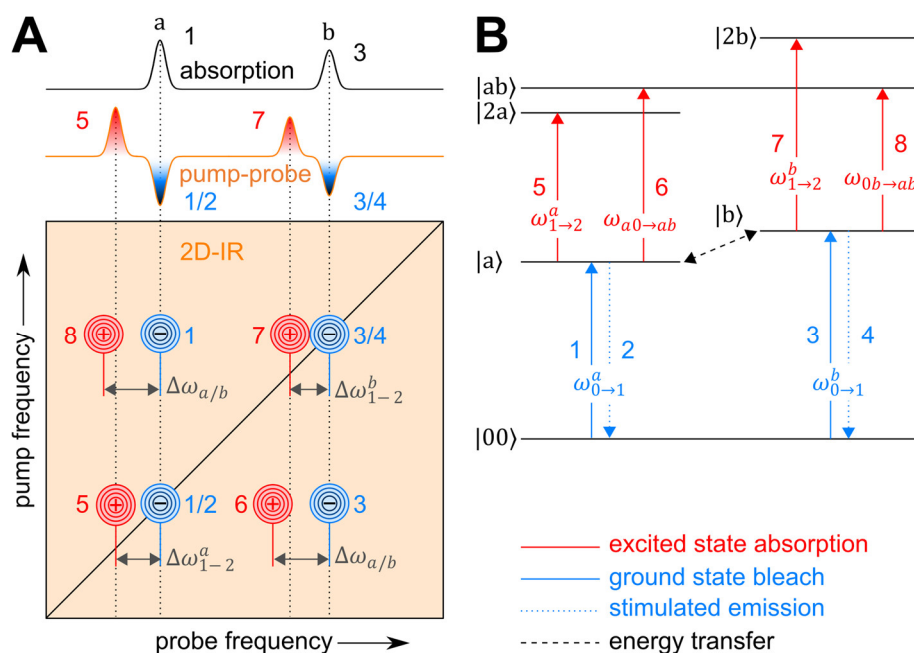

**Figure S1:** Infrared spectra (**A**) and three-level energy scheme (**B**) for two coupled vibrational modes  $a$  and  $b$ . Indicated quantities are introduced in the manuscript.  $\omega_H$  and  $\Delta\omega_{H-1}$  are hypothetical quantities (resulting from the harmonic approximation) and thus not included in the scheme.

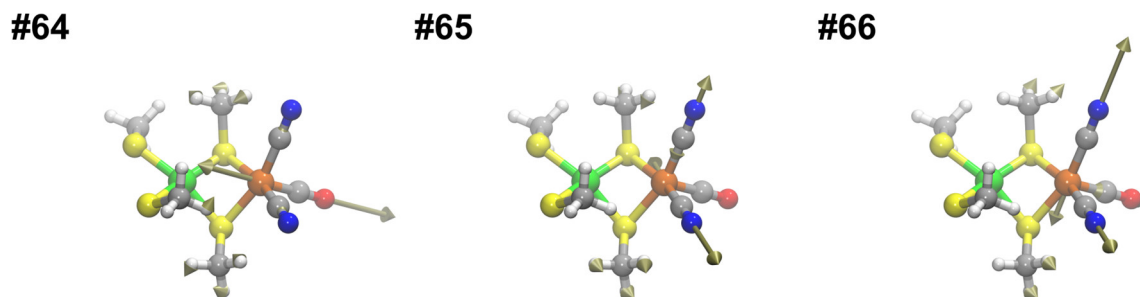

**Figure S2:** Normal mode eigenvectors (in Cartesian displacement coordinates) of  $vCO$ ,  $vCN_{as}$ , and  $vCN_s$  ligand stretch vibrations of the  $Ni-S$  state of [NiFe] hydrogenase (modes #64–#66). Vectors are uniformly scaled for proper cognition.

#31

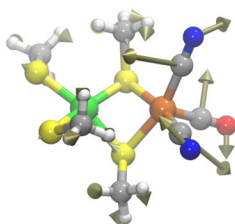

#32

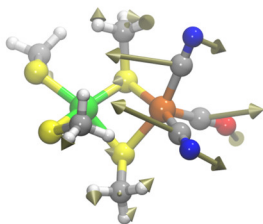

#33

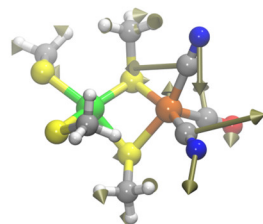

#34

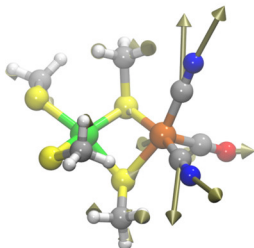

#35

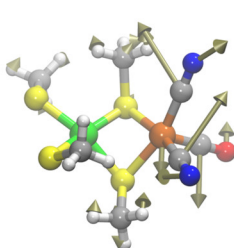

#36

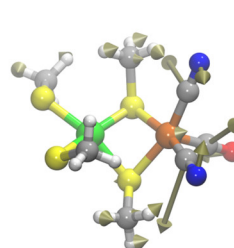

#37

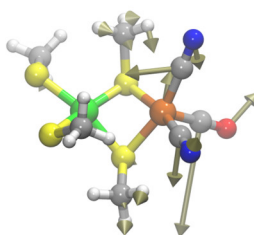

#38

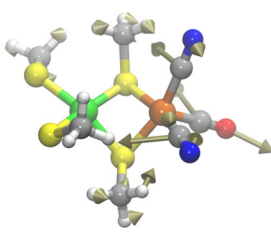

#39

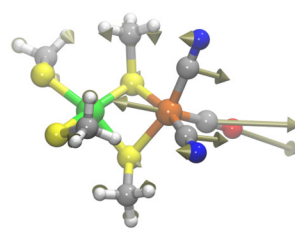

**Figure S3:** Normal mode eigenvectors (in Cartesian displacement coordinates) of  $\nu\text{Fe-CO/CN}$  and  $\delta\text{Fe-CO/CN}$  metal-ligand vibrations of the  $\text{Ni}_a\text{-S}$  state of [NiFe] hydrogenase (modes #31–#39). Vectors are uniformly scaled for proper cognition.

#22

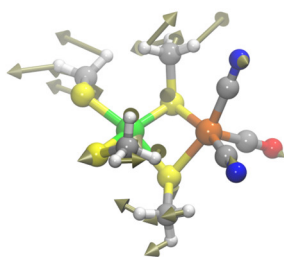

#23

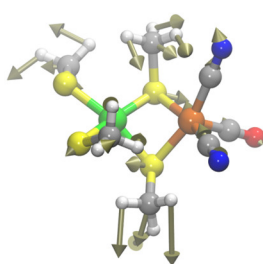

#24

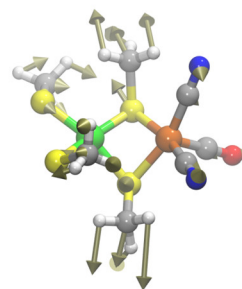

#25

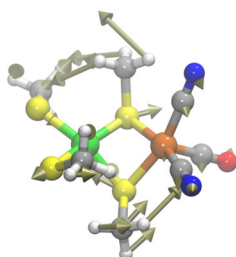

#26

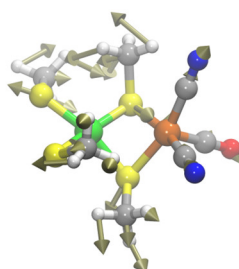

#27

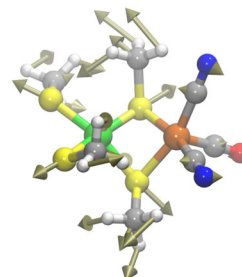

#28

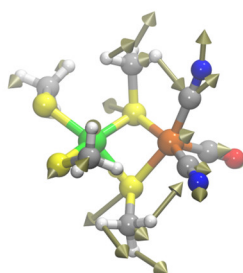

#29

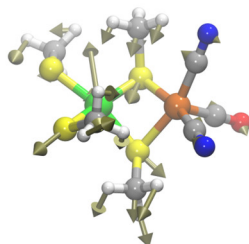

#30

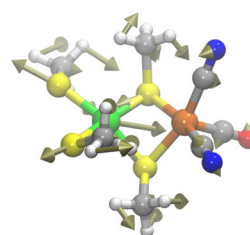

#40

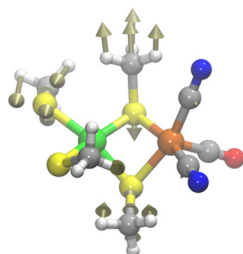

#41

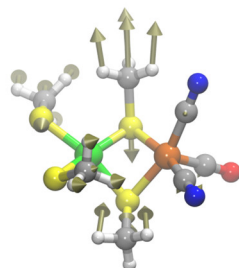

#42

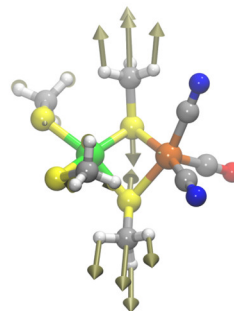

#43

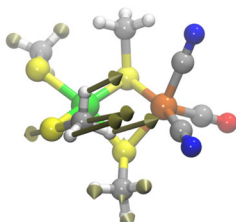

**Figure S4:** Normal mode eigenvectors (in Cartesian displacement coordinates) of  $\delta/\nu$ Ni-S vibrations (modes #22–#30) and  $\nu$ SC vibrations (modes #40–#43) of the  $\text{Ni}_a$ -S state of [NiFe] hydrogenase. Vectors are uniformly scaled for proper cognition.

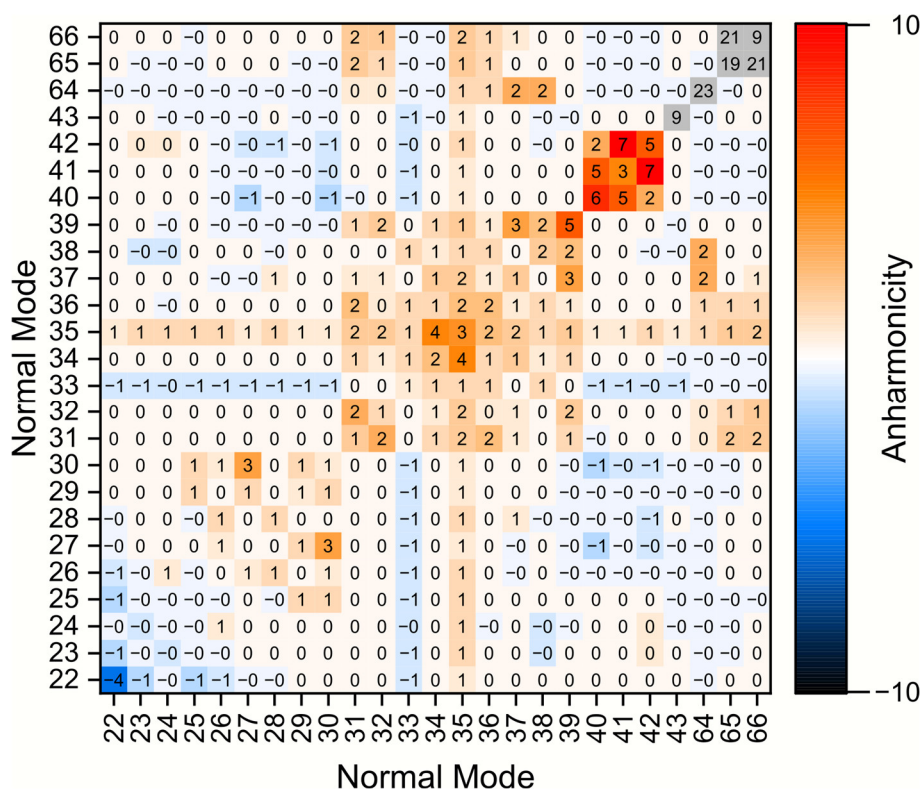

**Figure S5:** Matrix representation of intramode anharmonicities  $\Delta\omega_{1-2}^a$  and intermode anharmonicities  $\Delta\omega_{a/b}$  of  $\nu\text{CO/CN}$  vibrations (modes #64–#66),  $\delta/\nu\text{Fe–CO/CN}$  vibrations (modes #31–#39),  $\delta/\nu\text{Ni–S}$  vibrations (modes #22–#30), and  $\nu\text{SC}$  vibrations (modes #40–#43), as calculated for the  $\text{Ni}_a\text{-S}$  state of [NiFe] hydrogenase. Only the indicated vibrational degrees of freedom were included in the anharmonic analysis.

**Table S2:** Internal-coordinate description of vibrational modes for all computational models.<sup>‡</sup>

| $\text{Ni}_a\text{-S}$ |                              | $\text{Ni}_a\text{-C}$ |                              | Complex 1/2 |                              |
|------------------------|------------------------------|------------------------|------------------------------|-------------|------------------------------|
| mode #                 | type of vibration            | mode #                 | type of vibration            | mode #      | type of vibration            |
| 1–21                   | delocalized vibration        | 1–25                   | delocalized vibration        | 1–10        | delocalized vibration        |
| 22–30                  | $\delta/\nu\text{Ni–S}$      | 26–30                  | $\delta/\nu\text{Ni–S}$      |             |                              |
| 31–39                  | $\delta/\nu\text{Fe–CO/CN}$  | 31–39                  | $\delta/\nu\text{Fe–CO/CN}$  | 11–15       | $\delta/\nu\text{Fe–CO/CN}$  |
|                        |                              | 40                     | $\delta\text{Ni–H–Fe}$       | 18–20       |                              |
| 40–43                  | $\nu\text{SC}$               | 41–44                  | $\nu\text{SC}$               |             |                              |
| 44–63                  | $\delta\text{CH}_3$          | 45–52                  | $\delta\text{CH}_3$          | 16–17       | $\delta\text{Cp}$            |
|                        |                              | 53                     | $\nu\text{Ni–H–Fe}$          | 21–37       |                              |
|                        |                              | 54–66                  | $\delta\text{CH}_3/\text{H}$ |             |                              |
| 64–66                  | $\nu\text{CO}, \nu\text{CN}$ | 67–69                  | $\nu\text{CO}, \nu\text{CN}$ | 38–40       | $\nu\text{CO}, \nu\text{CN}$ |
| 67–78                  | $\nu\text{CH}_3$             | 70–81                  | $\nu\text{CH}_3$             | 41–45       | $\nu\text{Cp–H}$             |

<sup>‡</sup> $\delta$  – bending vibration;  $\nu$  – stretching vibration.
