# Supplementary material
Source: MDPI journal article supplement (https://www.mdpi.com/2073-4344/12/9/988)
Supplement: s1 [file s1 › Rippers_et_al_coordinates.xyz]

Nia-S
Number of atoms: 28
charge: -2
multiplicity: 1
 C 14.3641723039 5.79003508 68.8245131539
 S 14.5574955354 4.3474452677 67.6721485649
 C 11.8136664976 3.8232403099 69.9557184975
 S 13.3623094458 3.0500267269 70.6229569542
 C 14.5098434533 0.1187826669 66.7517554747
 S 15.638067855 1.5512129611 67.0608340336
 C 16.3178600507 -0.4908270102 69.7858211602
 S 15.4214060594 1.0060995465 70.3976752612
 Ni 14.678284097 2.4766597804 68.8829373194
 Fe 13.1820349715 0.7326038635 70.6729787106
 C 13.2411770493 -1.1057995603 70.2229943174
 N 13.32075467 -2.2575275537 69.9297683334
 C 11.3176869415 0.7463973882 70.3251869994
 N 10.1473573705 0.7829367567 70.1091657529
 C 12.9762554614 0.4356848855 72.3312036975
 O 12.8577292792 0.2400638981 73.4977651498
 H 14.5680992489 6.7117893813 68.2435396069
 H 13.3483062875 5.8706475872 69.2513954261
 H 14.372185783 -0.5090528136 67.6492787324
 H 13.5145491075 0.4649382971 66.4223562135
 H 10.9848216862 3.1039597607 70.0537978535
 H 11.9775691588 4.0666432662 68.8927894267
 H 17.1613163456 -0.6849624177 70.4732422875
 H 15.6339964359 -1.3542763055 69.7592520569
 H 16.6955024975 -0.2494542614 68.776156814
 H 11.6003586309 4.7431717135 70.5306259954
 H 14.9482035869 -0.5034837463 65.9456612029
 H 15.0834622297 5.7379570811 69.6603204636

Nia-C
Number of atoms: 29
charge: -2
multiplicity: 2
 C 15.3608792666 5.3574785844 69.2996904722
 S 14.8127792433 4.3660136463 67.8436460297
 C 11.1567147129 3.5809354449 69.5877554026
 S 12.7937772007 3.2049984062 70.3613521501
 C 13.9004765671 -0.2637611985 66.6500692938
 S 14.6471065833 1.4291334072 66.7195365489
 C 16.5341008408 0.4111885 69.8745351252
 S 15.381485779 1.7062814875 70.5152279146
 Ni 14.0662648673 2.3948546893 68.651112456
 Fe 13.1646953362 0.9325155403 70.5892183163
 C 13.6868375102 -0.8719783694 70.3139895354
 N 14.054133825 -1.9924400863 70.1467883569
 C 11.3495765768 0.4812965471 70.2395481976
 N 10.2042697681 0.2415843791 70.0231288994
 C 12.9783002059 0.6950677343 72.2964227263
 O 12.8486807971 0.5373014045 73.4640059939
 H 15.7520107126 6.3291811705 68.9373002958
 H 14.5276984549 5.5391280362 70.0006340093
 H 14.1277291713 -0.8380754673 67.5635418408
 H 12.8031477918 -0.2141701209 66.5418163159
 H 10.6053712798 2.6437769039 69.4082449421
 H 11.3403528292 4.1229624607 68.6445356657
 H 16.1201372552 -0.5888589965 70.0838919462
 H 16.6387810554 0.5430442874 68.7850574879
 H 17.5155602258 0.5421220278 70.3676795367
 H 10.5805741712 4.2277095843 70.2759918404
 H 14.3221083085 -0.7904260712 65.7712238242
 H 16.1616222421 4.8329443992 69.8502050145
 H 13.2594879719 1.0226361892 68.8848067116

complex 1
number of atoms: 17
charge: -1
multiplicity: 1
 C -0.3853442051 1.7577190761 -0.0518988951
 C -1.6824880003 1.1631600031 0.0080261056
 C -1.5291395561 -0.2671386076 0.0240125024
 C -0.1186617101 -0.5481775153 -0.0090755179
 C 0.5895341694 0.6908832319 -0.0625599278
 H -0.1695683941 2.827370006 -0.0566879977
 H -2.6271672979 1.7008840813 0.0932288647
 H -2.3302721127 -1.0001113639 0.113572891
 H 0.33273403 -1.5382161984 0.0608600704
 H 1.6741567261 0.8097316097 -0.076850531
 Fe -0.571715601 0.5907550581 1.7255538365
 C -2.0927233842 1.0283161449 2.7597504362
 C -0.2624660899 -0.9745844849 2.7397352092
 C 0.4526910111 1.5164474191 2.7676597933
 N -3.0791761683 1.3545737415 3.3334686878
 N -0.0205650118 -1.9925481602 3.3000204837
 O 1.1690573456 2.1642728977 3.4473818885

complex 2
number of atoms: 17
charge: 0
multiplicity: 1
 C -1.7276333923 -0.7137204519 0.9734974562
 C -1.6804709105 -1.1609655243 -0.4002818277
 C -1.659735258 0.0000002492 -1.2355152485
 C -1.6804704918 1.1609660696 -0.4002818259
 C -1.7276331499 0.7137209938 0.973497416
 H -1.7450457967 -1.3558551411 1.8571823959
 H -1.6512033639 -2.2001674923 -0.7420077337
 H -1.5680838224 0.0000002403 -2.3297504356
 H -1.6512024768 2.2001680249 -0.7420077531
 H -1.7450452624 1.3558557411 1.8571823187
 Fe 0.0433394107 -0.0000000564 0.0565862739
 C 1.0588367452 -1.2910057023 0.697753108
 C 1.0597386521 0.0000020157 -1.5490169848
 C 1.0588373238 1.2910034604 0.6977564432
 N 1.6591738184 0.0000033189 -2.5683283662
 O 1.7131960542 2.1553749067 1.1286493122
 O 1.7131949654 -2.1553786311 1.1286437563
